# Supplementary material
Source: HighWire-hosted journal article supplement (https://www.cmajopen.ca/highwire/filestream/87342/field_highwire_adjunct_files/3/open-2021-0085-4-at.pdf)
Supplement: open-2021-0085-4-at.pdf [file open-2021-0085-4-at.pdf]

**Table S4: Odds ratios for positive COVID-19 swab test**

| Type                | Effect                           | Index group | Reference group | Odds ratio | Lower | Upper | P-value |
|---------------------|----------------------------------|-------------|-----------------|------------|-------|-------|---------|
| Crude odds ratio    | Age (continuous)                 | +10 years   |                 | 0.98       | 0.953 | 0.998 | 0.0339  |
| Crude odds ratio    | Sex                              | Male        | Female          | 1.10       | 0.997 | 1.215 | 0.0572  |
| Crude odds ratio    | Anosmia                          | Yes         | No              | 7.73       | 6.641 | 8.986 | <.0001  |
| Crude odds ratio    | Cough and/or shortness of breath | Yes         | No              | 3.58       | 3.217 | 3.973 | <.0001  |
| Crude odds ratio    | Diarrhea and/or abdominal pain   | Yes         | No              | 1.54       | 1.306 | 1.821 | <.0001  |
| Crude odds ratio    | Fever                            | Yes         | No              | 4.68       | 4.166 | 5.266 | <.0001  |
| Adjusted odds ratio | Age (continuous)                 | +10 years   |                 | 1.01       | 0.984 | 1.032 | 0.5070  |
| Adjusted odds ratio | Sex                              | Male        | Female          | 1.06       | 0.958 | 1.172 | 0.2587  |
| Adjusted odds ratio | Anosmia                          | Yes         | No              | 5.29       | 4.500 | 6.217 | <.0001  |
| Adjusted odds ratio | Cough and/or shortness of breath | Yes         | No              | 2.58       | 2.300 | 2.894 | <.0001  |
| Adjusted odds ratio | Diarrhea and/or abdominal pain   | Yes         | No              | 0.71       | 0.597 | 0.849 | 0.0002  |
| Adjusted odds ratio | Fever                            | Yes         | No              | 3.23       | 2.834 | 3.685 | <.0001  |
